# Supplementary material for: Three-dimensional molecular donors combined with polymeric acceptors for high performance fullerene-free organic photovoltaic devices
Source: Royal Society of Chemistry journal article supplement (doi:10.1039/c5ta06639e), 2015-01-01
Supplement: c5ta06639e1.pdf [file c5ta06639e1.pdf]

## Three-dimensional molecular donors combined with polymeric acceptors for high performance fullerene-free organic photovoltaics

Shi-Yong Liu,<sup>abc</sup> Jae Woong Jung,<sup>a</sup> Chang-Zhi Li,<sup>ab</sup> Jiang Huang,<sup>ad</sup> Jianyuan Zhang,<sup>a</sup> Hongzheng Chen<sup>\*b</sup> and Alex K.-Y. Jen<sup>\*ab</sup>

<sup>a</sup> Department of Materials Science and Engineering, University of Washington, Box 352120, Seattle, Washington 98195, USA

<sup>b</sup> Department of Polymer Science & Engineering, Zhejiang University, Hangzhou, 310027, P. R. China

<sup>c</sup> Department of Pharmacy & Chemistry, Taizhou University, Taizhou 317000, P. R. China

<sup>d</sup> School of Optoelectronic Information, University of Electronic Science and Technology of China, Chengdu 610054, P. R. China

### Contents

|                                                                                                                      |     |
|----------------------------------------------------------------------------------------------------------------------|-----|
| 1. Synthesis of intermediates <b>TBPM</b> , <b>TBPS</b> and <b>Ph-DPP</b> .....                                      | S2  |
| 2. <b>Figs. S1-5</b> (NMR and MS spectra).....                                                                       | S4  |
| 3. <b>Fig. S6</b> (DSC curves of <b>C-DPP</b> and <b>Si-DPP</b> ).....                                               | S9  |
| 4. <b>Fig. S7</b> (UV-vis absorption spectra of <b>C-DPP</b> and <b>Si-DPP</b> solutions in CHCl <sub>3</sub> )..... | S9  |
| 5. <b>Fig. S8</b> (UV-vis absorption spectra of BHJs of 3D-DPP:PC <sub>71</sub> BM ).....                            | S10 |
| 6. <b>Fig. S9</b> , <b>Table S1</b> (OPVs of <b>Si-DPP</b> :N2200 processed by various solvents).....                | S10 |
| 7. <b>Fig. S10</b> . (The structure of DF-N2200).....                                                                | S11 |
| 8. <b>Fig. S11</b> (Normalized UV-vis absorption and IPCE spectra of 3D-DPP:N2200 BHJs).....                         | S11 |
| 9. <b>Fig. S12</b> (charge transfer between 3D-DPP donors with N2200 and PC <sub>71</sub> BM acceptor).....          | S11 |
| 10. <b>Fig. S13</b> (Models of 3D-DPP:PC <sub>71</sub> BM and 3D-DPP:N2200 BHJs).....                                | S12 |
| 11. <b>Fig. S14</b> (PL spectra of <b>3D-DPP</b> and <b>3D-DPP</b> :PC <sub>71</sub> BM BHJs) .....                  | S12 |
| 12. <b>Fig. S15</b> (AFM height images of 3D-DPP:N2200 and 3D-DPP:PC <sub>71</sub> BM BHJs).....                     | S13 |
| 13. <b>Fig. S16</b> (J-V curves for hole-only and electron-only devices.) .....                                      | S13 |
| 14. <b>References</b> .....                                                                                          | S13 |

**Synthesis of Intermediates TBPM, TBPS and Ph-DPP**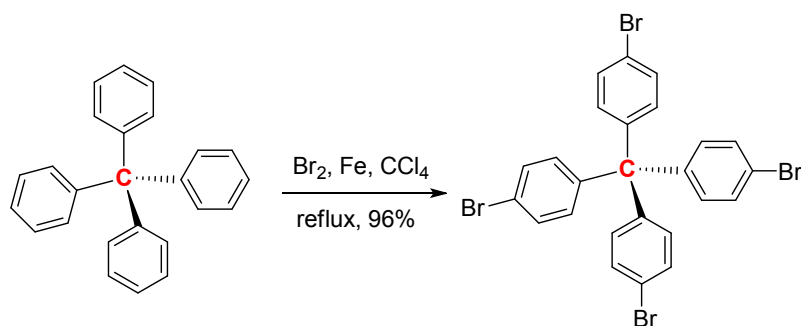**Scheme S1**

Scheme S1 shows the synthetic route of intermediate compound **TBPM**, according to the reported procedure.<sup>[S1]</sup> Tetraphenylmethane (1.6 g, 5 mmol) was warmed with stirring to 30-35 °C in 25 mL CCl<sub>4</sub> containing 0.05 g iron filings. Bromine (4 g, 25 mmol) was added cautiously and slowly, maintaining the temperature. A solution of aqueous alkali (KOH) was used in a bubbler trap attached to the end of a condenser to avoid HBr fumes. After several hours at 30-35 °C the solution was refluxed for 1 day at which time the dark-brown solution had become paler and all the initially insoluble tetraphenylmethane had dissolved. The solution was then cooled to room temperature and red-brown crystals were collected. After crystallization from a chloroform-methanol mixture, pale, off-white crystals were obtained. Yield, 3.2 g (96%); **TBPM**: <sup>1</sup>H NMR (300 MHz, CDCl<sub>3</sub>) δ 7.55 –7.53 (d, *J* = 8.4, 8H), 7.35 –7.32 (d, *J* = 8.4, 8H).

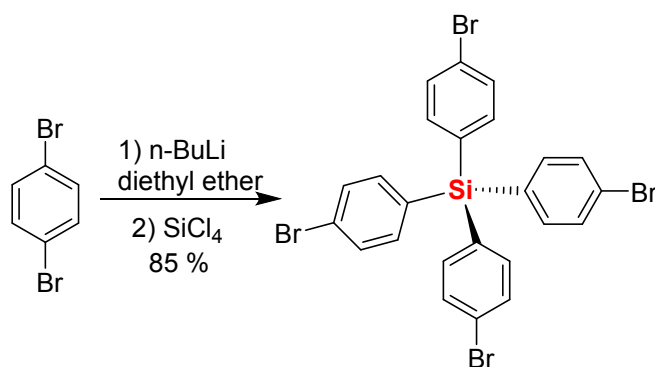**Scheme S2**

Scheme S2 shows the synthetic route of intermediate compound **TMPS**. Based on the reported procedure with slight modifications,<sup>[S2]</sup> detailed procedures are as follows. A solution of 1,4-dibromobenzene (11.8 g, 50 mmol) in anhydrous ether (125 mL) was stirred at  $-10^{\circ}\text{C}$  under argon and treated dropwise with a solution of butyllithium (20 mL, 2.5 M in hexane, 50 mmol). The resulting mixture was kept at  $-10^{\circ}\text{C}$  for 15 min, and then  $\text{SiCl}_4$  (1.43 mL, 12.5 mmol) was added dropwise. The mixture was stirred at  $-10^{\circ}\text{C}$  for 30 min and at  $25^{\circ}\text{C}$  for 12 h. Then 1 M aqueous HCl was added, and the resulting mixture was extracted with ether. The combined extracts were washed with  $\text{H}_2\text{O}$  and brine, dried over  $\text{MgSO}_4$ , and filtered. Volatiles were removed by evaporation under reduced pressure, and the residue was recrystallized twice from ethanol to afford colorless crystal of tetrakis(4-bromophenyl)silane. **TMPS**:  $^1\text{H NMR}$  (300 MHz,  $\text{CDCl}_3$ )  $\delta$  7.62 –7.51 (d,  $J = 8.4$ , 8H), 7.42 –7.32 (d,  $J = 8.4$ , 8H).

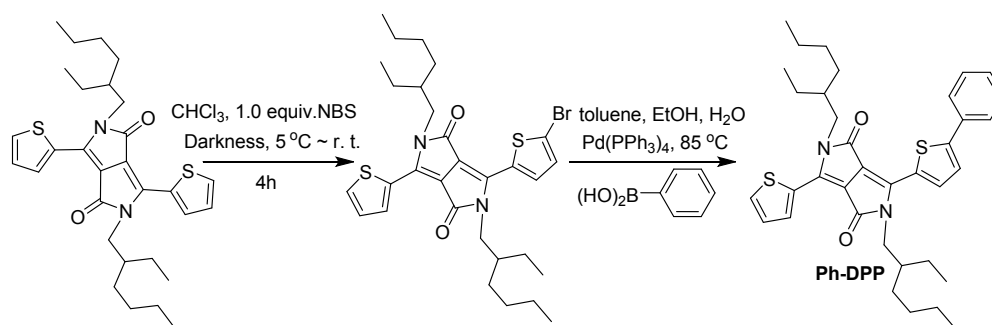

**Scheme S3**

Scheme S3 shows the synthetic route of intermediate compound **Ph-DPP**, according to our previously reported procedure.<sup>[S3]</sup> **Ph-DPP**:  $^1\text{H NMR}$  (300 MHz,  $\text{CDCl}_3$ )  $\delta$  8.90 (d,  $J = 3.9$  Hz, 1H), 8.64 (d,  $J = 4.2$  Hz, 1H), 7.65 (d,  $J = 5.1$  Hz, 1H), 7.29 – 7.18 (m, 2H), 4.03–3.92 (m, 4H), 1.84(m, 2H), 1.38–1.23 (m, 16H), 0.91–0.83 (m, 12H).

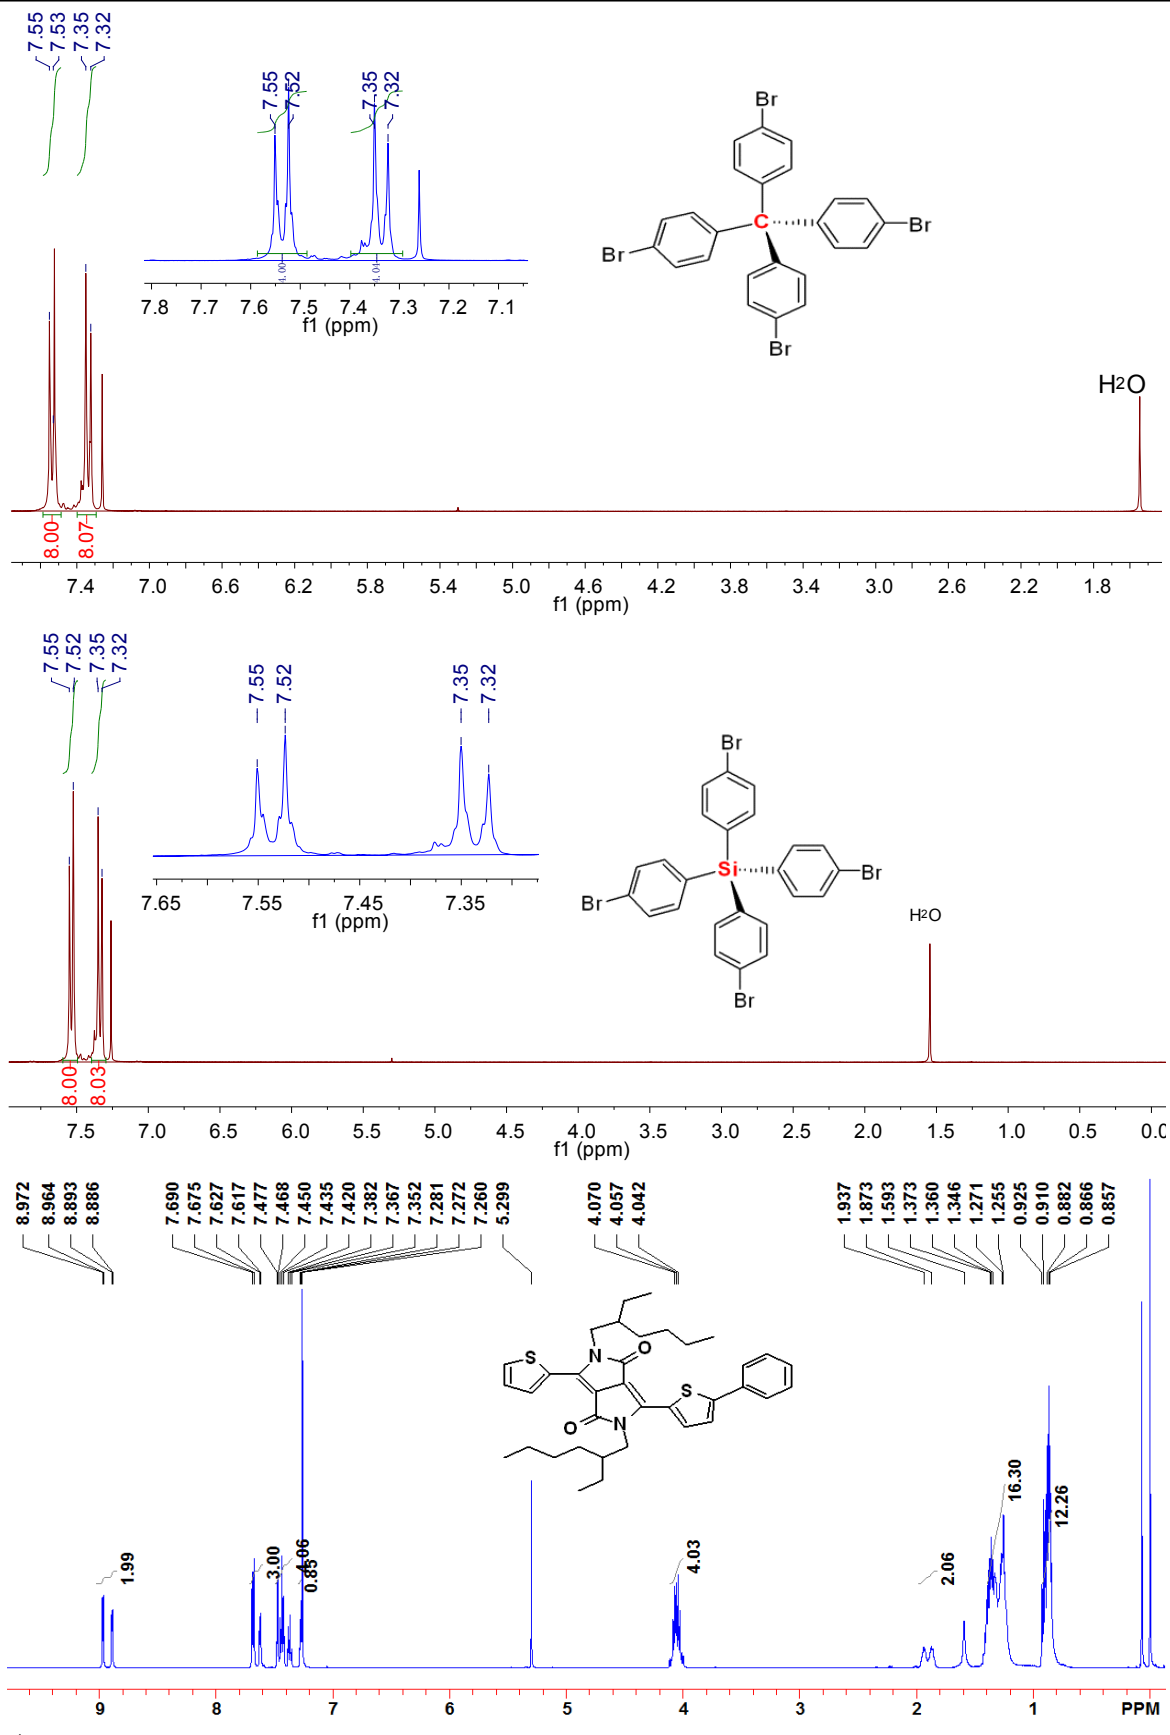**Fig. S1** <sup>1</sup>H NMR spectra of TBPM, TBPS and Ph-DPP

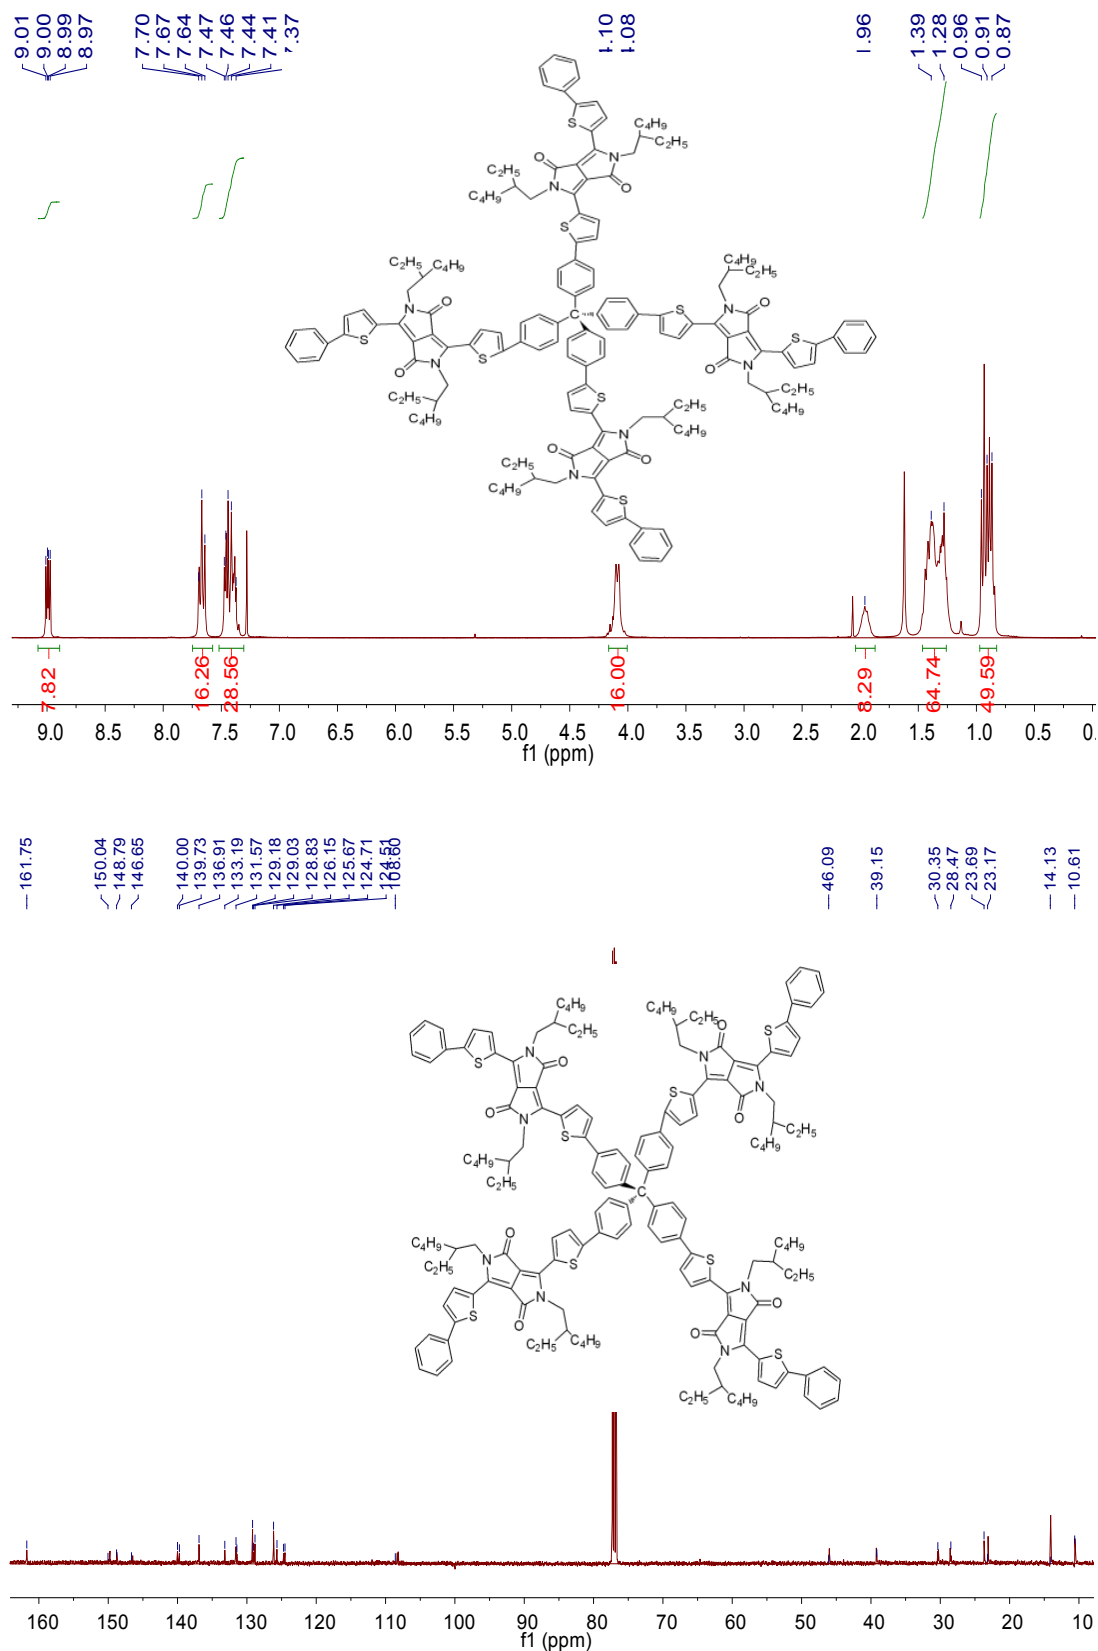**Fig. S2** <sup>1</sup>H NMR and <sup>13</sup>C NMR spectra of C-DPP.

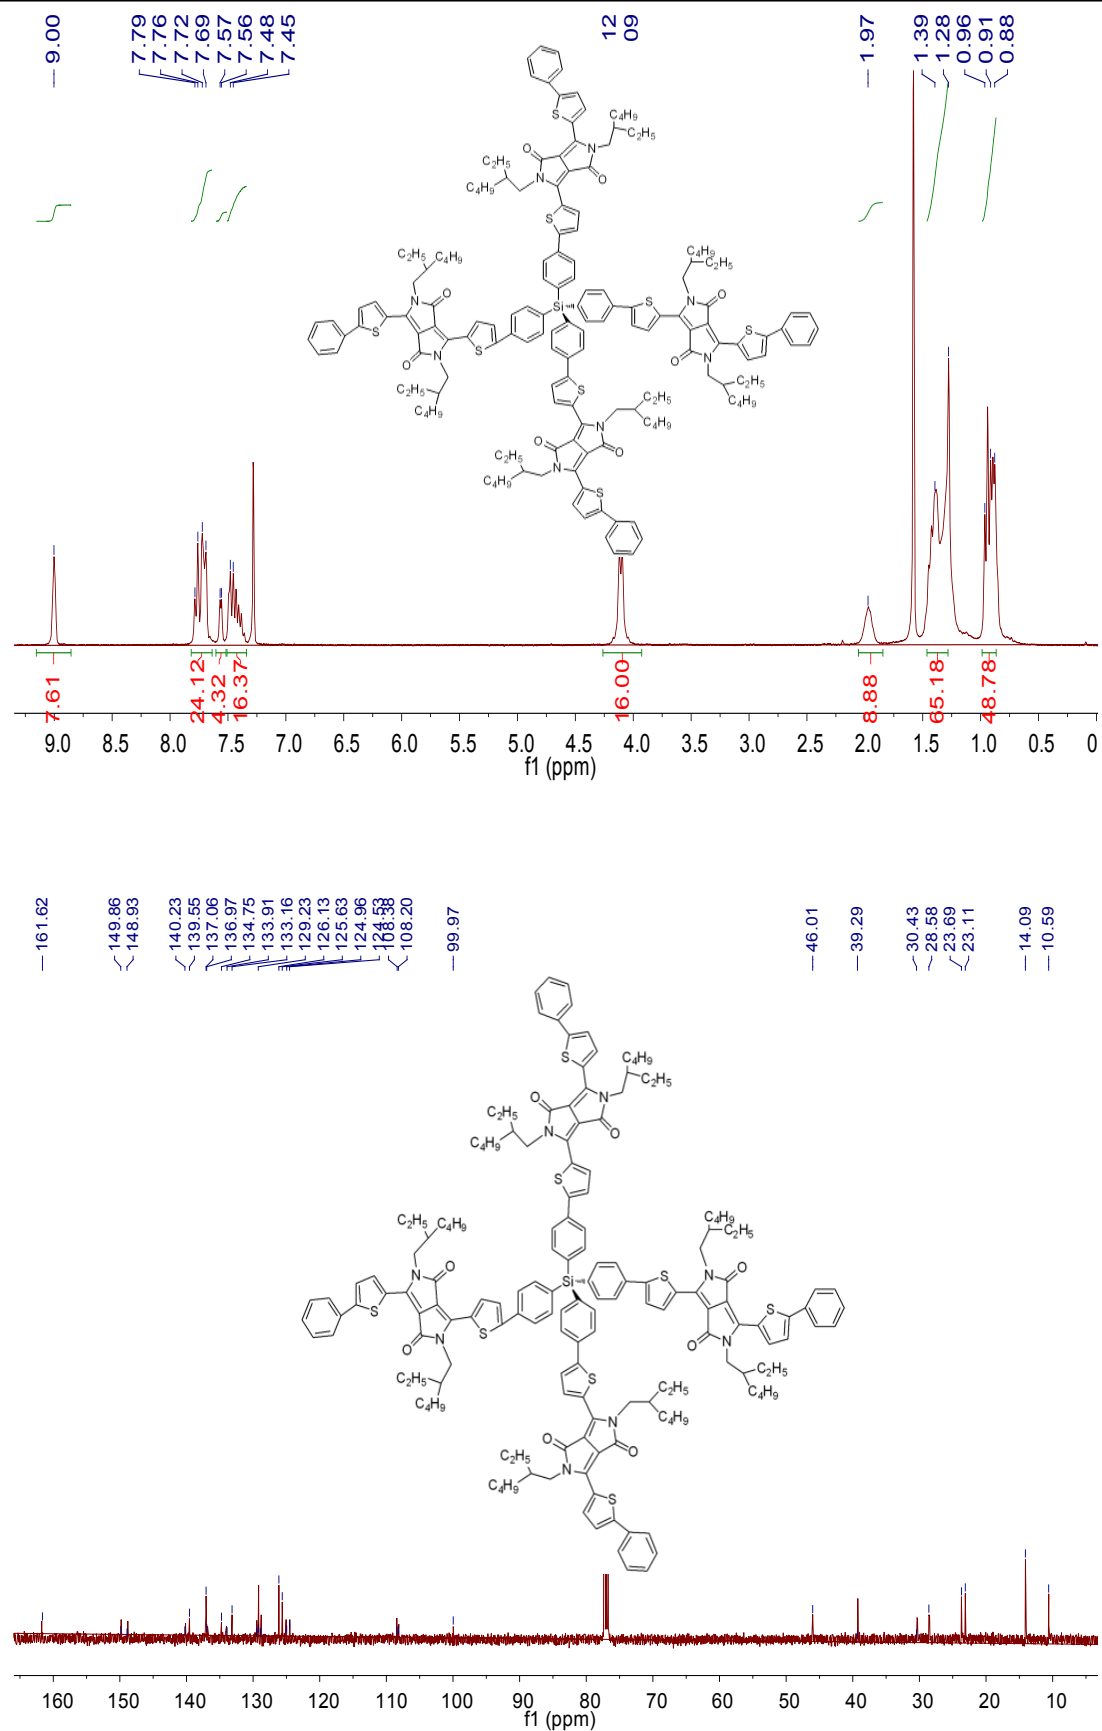**Fig. S3**  $^1\text{H}$  NMR and  $^{13}\text{C}$  NMR spectra of Si-DPP.

Comment 1 Lys082601

Comment 2

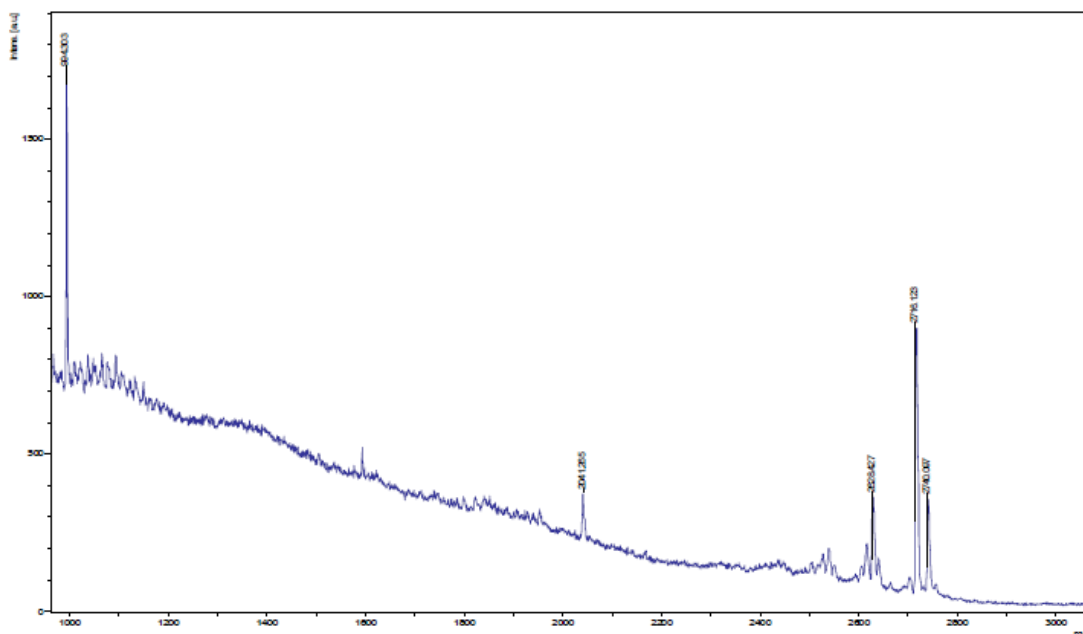

D:\Data\Alex Jen\LSY082601\Lys082601\_0\_E2111

MALDI SPECTRUM

8/28/2014 12:57:39 PM

Comment 1 Lys082601

Comment 2

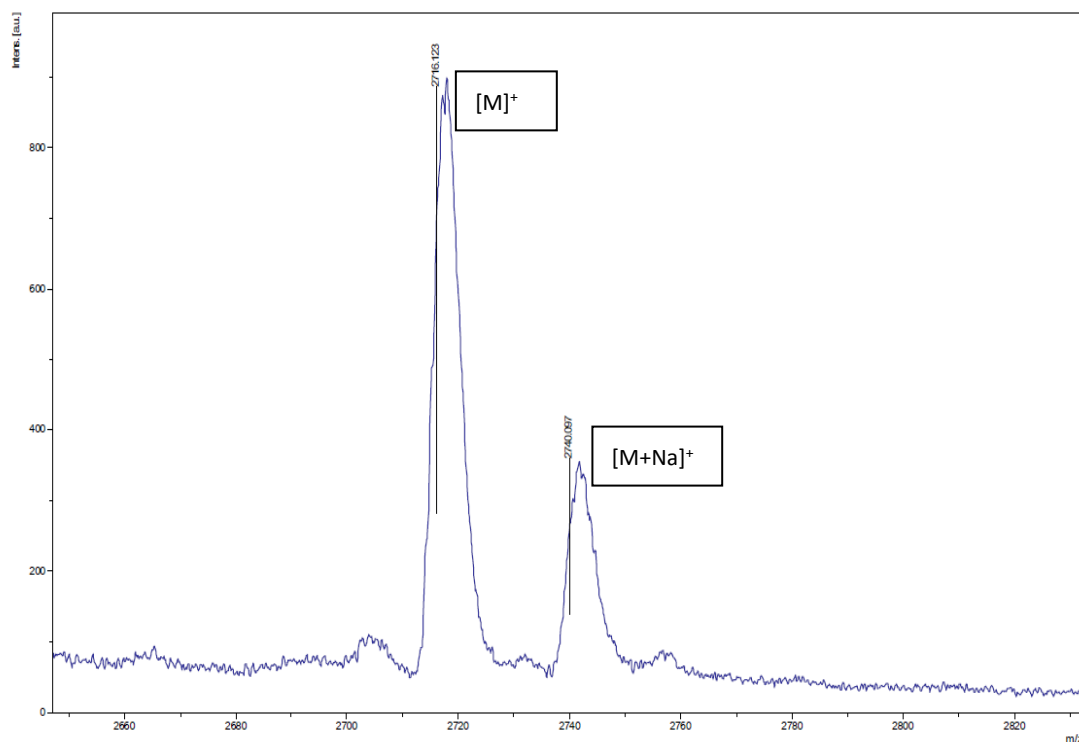

**Fig. S4** MALDI-TOF MS spectrum of **C-DPP**, calcd: 2715.89; found: 2716.12.

D:\Data\Alex Jen\Lsy082602\LSY082602\_0\_G7.1

MALDI SPECTRUM

8/28/2014 2:31:29 PM

Comment 1 LSY082602

Comment 2

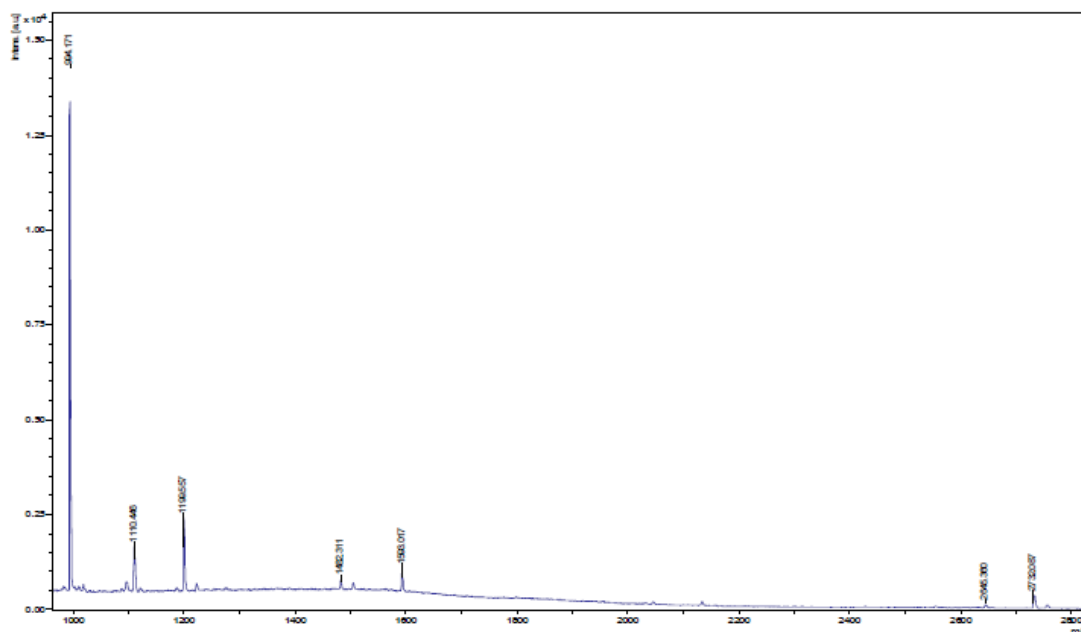

D:\Data\Alex Jen\Lsy082602\LSY082602\_0\_G7.1

MALDI SPECTRUM

8/28/2014 2:30:00 PM

Comment 1 LSY082602

Comment 2

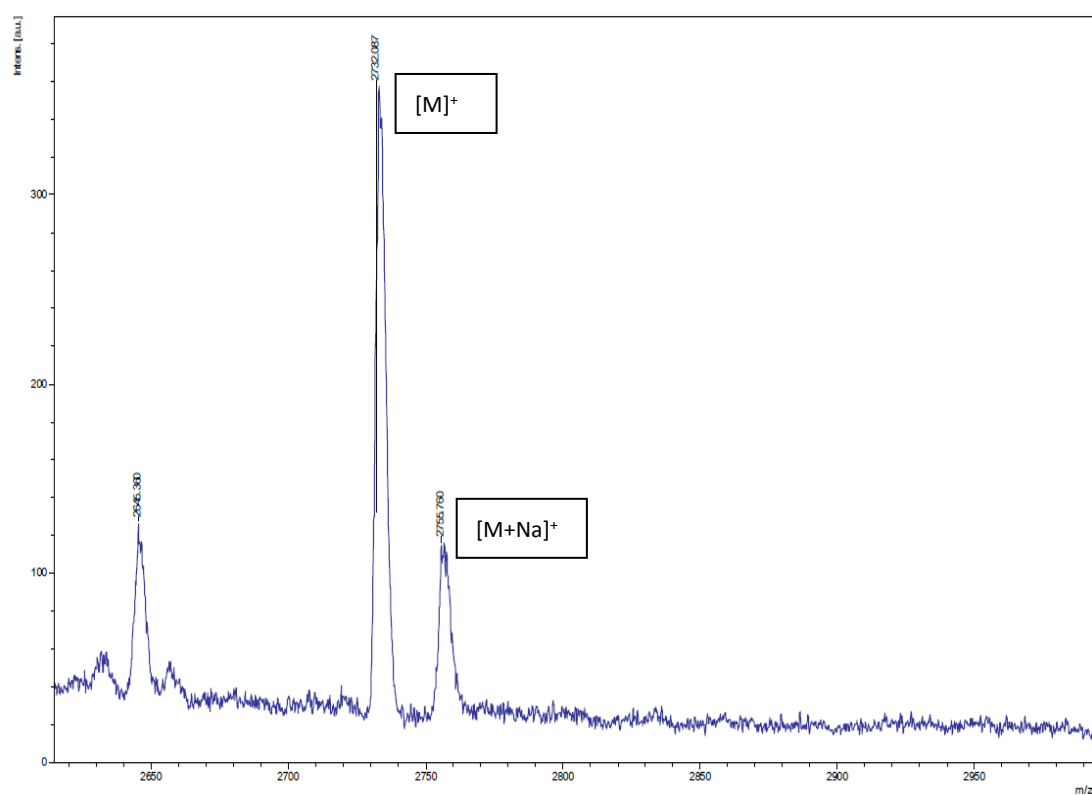**Fig. S5** MALDI-TOF MS spectrum of **Si-DPP**, calcd: 2731.97; found: 2732.09.



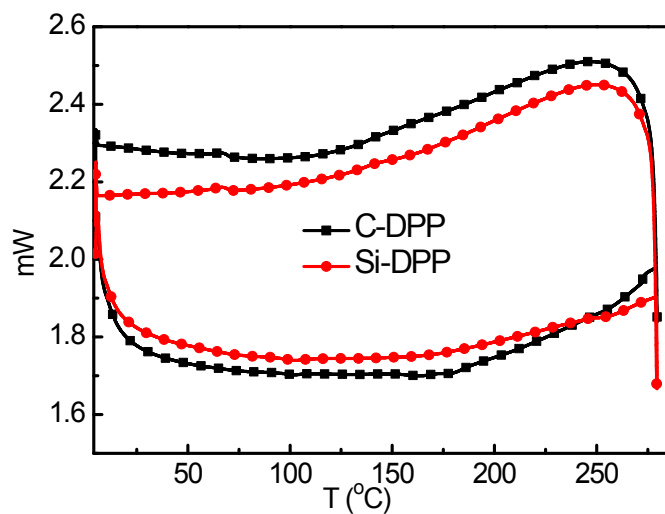

**Fig. S6** DSC curves of **C-DPP** and **Si-DPP** (neither melting nor re-crystallization was detected).

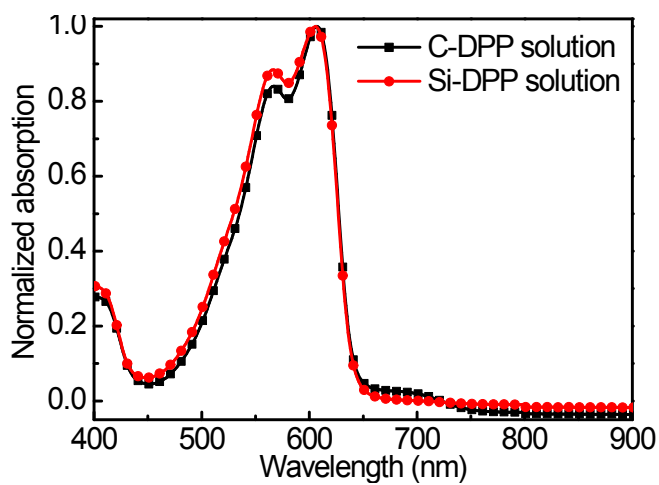

**Fig. S7** UV-vis absorption spectra of **C-DPP** and **Si-DPP** solutions in  $\text{CHCl}_3$ .

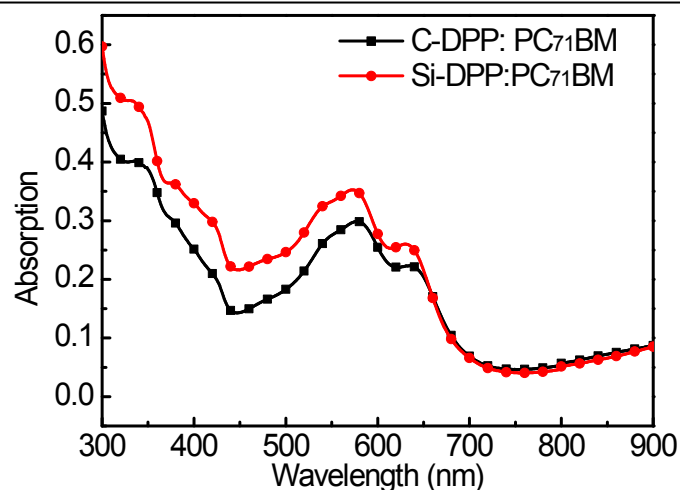

**Fig. S8** UV-vis absorption spectra of BHJs of C-DPP:PC<sub>71</sub>BM and Si-DPP: PC<sub>71</sub>BM. (They show mainly the features of 3D-DPPs absorption, along with the absorption less than 350 nm arising from PC<sub>71</sub>BM.)

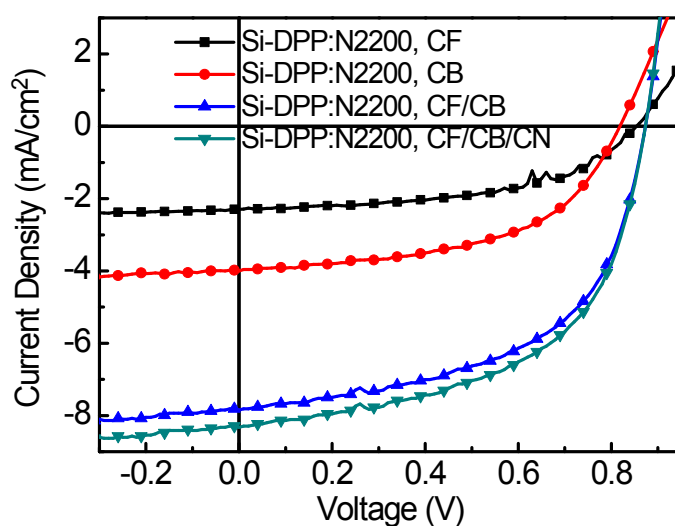

**Fig. S9** J-V curves of Si-DPP:N2200 processed by various solvents.

**Table S1** Effects of processing solvents on the OPV performance of Si-DPP:N2200.

| Solvents               | V <sub>oc</sub> [V] | J <sub>sc</sub> [mA cm <sup>-2</sup> ] | FF          | PCE [%]     |
|------------------------|---------------------|----------------------------------------|-------------|-------------|
| CF                     | 0.85                | 2.29                                   | 0.52        | 1.03        |
| CB                     | 0.82                | 4.00                                   | 0.53        | 1.73        |
| CF/CB <sup>a)</sup>    | 0.87                | 7.85                                   | 0.55        | 3.76        |
| CF/CB/CN <sup>b)</sup> | <b>0.87</b>         | <b>8.32</b>                            | <b>0.56</b> | <b>4.02</b> |

<sup>a)</sup> CF/CB (1:1, v/v); <sup>b)</sup> CF/CB/CN (1:1:0.03, v/v)

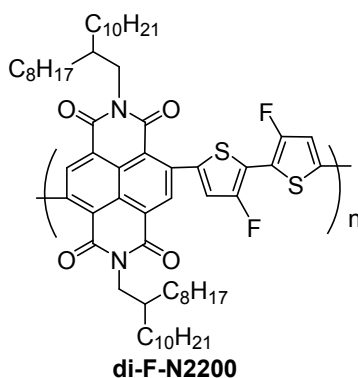

**Fig. S10** The structure of di-F-N2200.

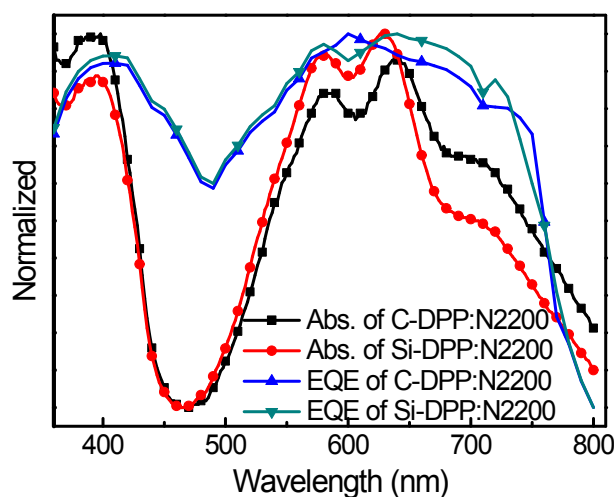

**Fig. S11** Normalized UV-vis absorption and IPCE spectra of 3D-DPP:N2200 BHJs.  
(The trends of UV-vis and EQE spectra of 3D-DPP:N2200 BHJs correlate well with each other).

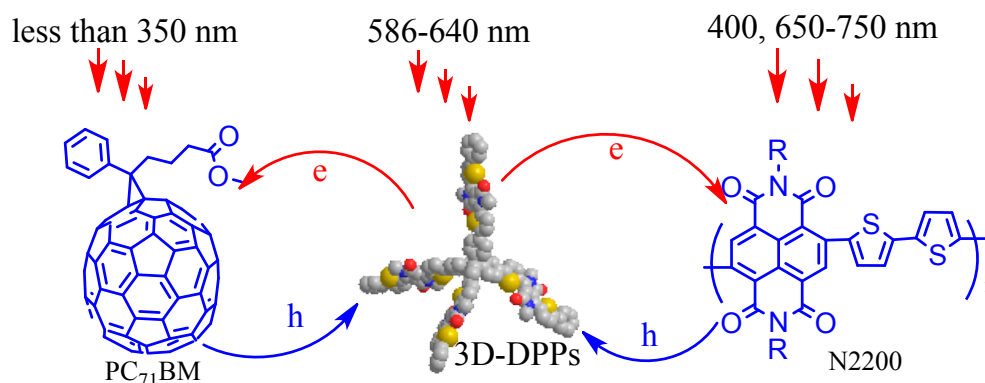

**Fig. S12** Photo-absorption and photo-generated charge transfer between 3D-DPP donors with N2200 and PC<sub>71</sub>BM acceptors (As compared with 3D-DPPs:PC<sub>71</sub>BM, both the photon-generated electron on donors (3D-DPPs) transferring to acceptor (N2200) and the photon-generated hole on acceptor transferring to donors contributes to the enhanced  $J_{SCS}$ ).

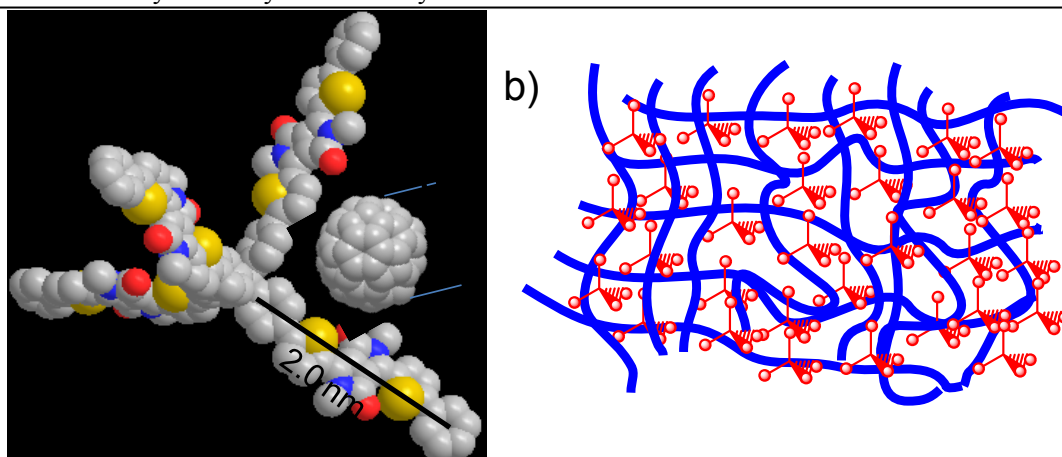

**Fig. S13** Proposed models for the D-A distributions in the BHJs of 3D-DPP:PC<sub>71</sub>BM and 3D-DPP:N2200. (a) The intimate D-A mixing between 3D-DPPs and PCBM will enhance the quenching of PL emission, however, but it will prevent the formation of suitable phase separation and adversely affect charge separation; b) The blend of crystalline N2200 and amorphous 3D-DPPs allows easier nanoscale phase separation, facilitating better charge separation and transport.)

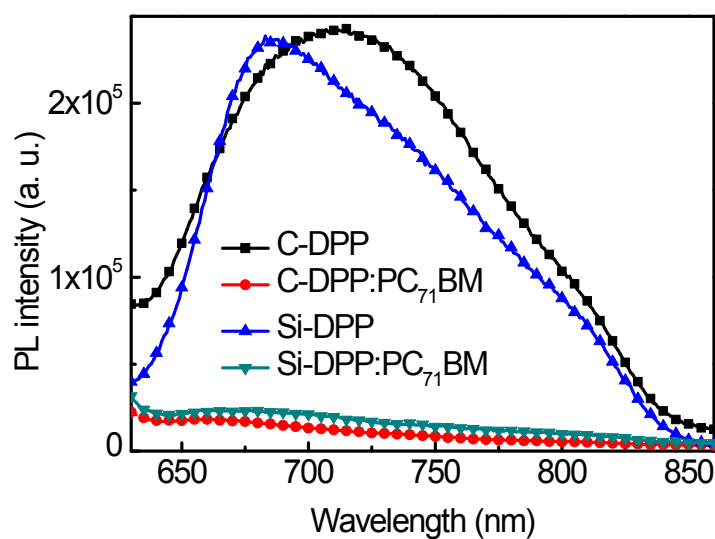

**Fig. S14** Steady PL spectra of **C-DPP** and **Si-DPP** films, and **C-DPP:PC<sub>71</sub>BM** and **Si-DPP:PC<sub>71</sub>BM** BHJs (excited at 600 nm).

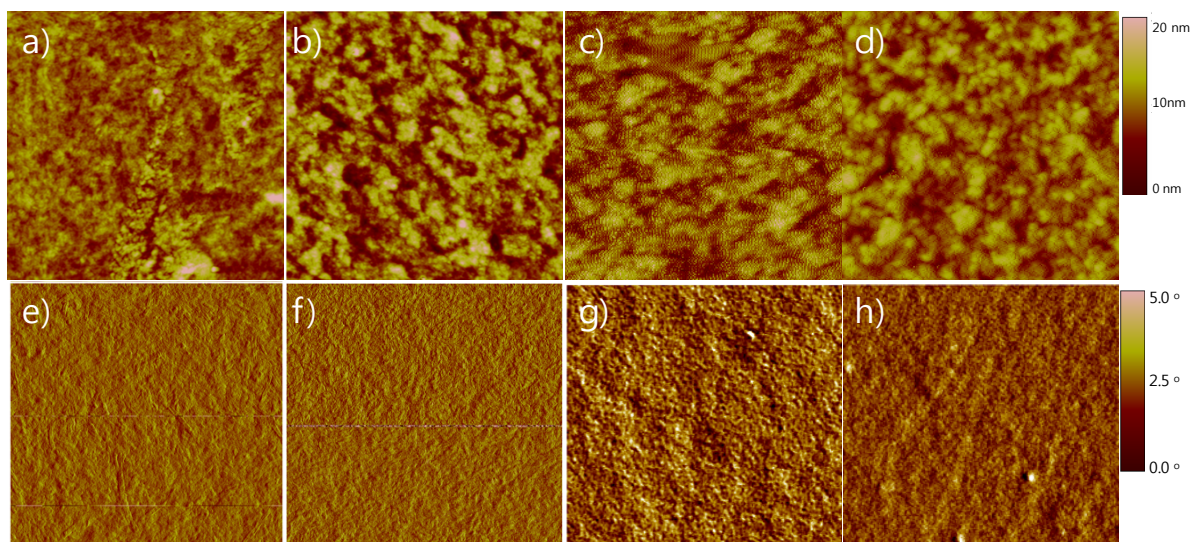

**Fig. S15** AFM height images (a, b, c, d) and corresponding phase images (e, f, g, h) of BHJs C-DPP:N2200, Si-DPP:N2200, C-DPP:PC<sub>71</sub>BM, and Si-DPP:PC<sub>71</sub>BM. Scale: 2  $\mu\text{m}$   $\times$  2  $\mu\text{m}$ .

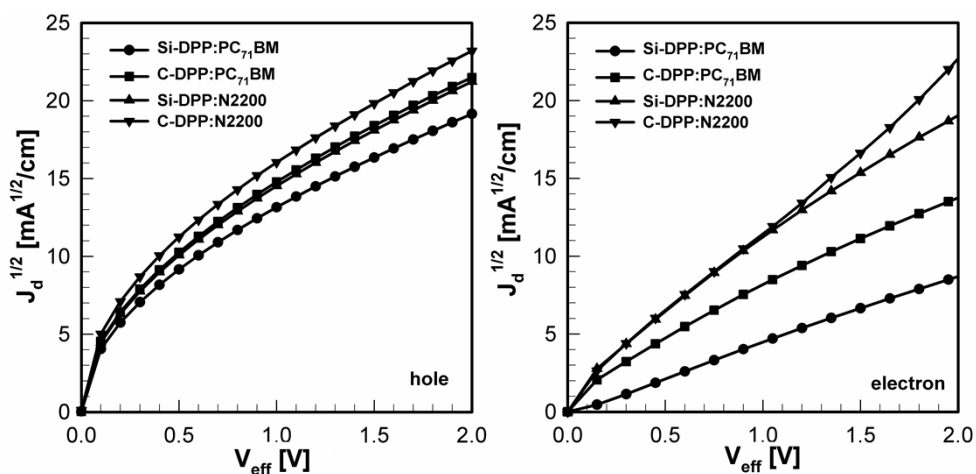

**Fig. S16** J-V curves for a) hole-only and b) electron-only devices.

## References

- [S1] L. M. Wilson, A. C. Griffin, *J. Mater. Chem.*, 1993, **3**, 991.
- [S2] J.-H. Fournier, X. Wang, J. D. Wuest, *Can. J. Chem.*, 2003, **81**, 376.
- [S3] S. Liu, M. Shi, J. Huang, Z. Jin, X. Hu, J. Pan, H. Li, A. K.-Y. Jen, H.-Z. Chen, *J. Mater. Chem. A*, 2013, **1**, 2795.
